# Supplementary material
Source: publisher figshare collection journal article supplement (https://future-science-group.figshare.com/articles/dataset/_/21769256)
Supplement: Supplementary file 1 [file 1]

## Sheet: Sheet1
Supplementary Table 3 List of results of differential expression analysis
gene	N mean	T mean	logFC	p	FDR
A1CF	5.57848	2.63965	-1.07952	1.86097e-15	8.31102e-15
ACTL6A	10.0968	19.8818	0.977551	3.1566e-19	2.61416e-18
ACTL6B	0.0957805	0.0270531	-1.82394	1.34386e-22	3.58222e-21
ACTR3B	0.797673	2.04464	1.35797	4.37629e-24	3.43186e-22
ACTR5	3.4425	7.62902	1.14804	1.98688e-22	4.84232e-21
ADNP	9.79003	18.6976	0.933464	5.20783e-19	4.03843e-18
AEBP2	3.35944	5.0241	0.580645	1.25164e-11	3.96896e-11
AHCTF1	3.18095	4.93638	0.633995	3.67246e-09	9.08002e-09
AICDA	0.226346	0.0375161	-2.59295	9.8325e-15	4.11133e-14
ANP32B	82.5011	130.841	0.665331	1.7869e-13	6.77434e-13
ANP32E	10.5064	17.8493	0.764593	4.64897e-08	1.0354e-07
APBB1	4.28066	1.60367	-1.41646	4.78485e-15	2.06135e-14
APEX1	55.2219	91.1062	0.722308	1.45459e-13	5.53913e-13
APOBEC3A	2.20433	0.381825	-2.52936	5.42483e-16	2.55656e-15
APOBEC3B	9.36187	3.24407	-1.52899	2.83487e-12	9.52026e-12
ARID3A	1.62055	7.67785	2.24422	2.92964e-19	2.44998e-18
ARID3C	0.0672122	0.154981	1.2053	0.000369096	0.000580883
ARID5A	5.90364	8.74696	0.567176	1.51047e-06	2.92825e-06
ARID5B	4.77836	7.11282	0.573906	1.9789e-05	3.51667e-05
ARNTL	2.22941	1.43665	-0.633952	9.42022e-11	2.74247e-10
ARRB1	8.27405	4.10694	-1.01053	3.02358e-22	6.61311e-21
ASCL1	0.0781951	0.0291364	-1.42426	1.60789e-18	1.14294e-17
ASCL2	4.47096	68.8732	3.94529	2.55511e-18	1.70274e-17
ASF1B	12.3963	27.9628	1.17361	2.13345e-17	1.25506e-16
ASXL1	3.56465	7.2176	1.01776	3.25697e-17	1.85213e-16
ASXL3	0.353824	0.0988112	-1.84029	1.2256e-19	1.10046e-18
ATAD2	2.5713	8.84523	1.7824	3.88984e-21	5.72075e-20
ATF7IP	4.32577	6.18404	0.515594	1.27231e-05	2.3042e-05
ATR	0.681727	1.60474	1.23508	1.80994e-18	1.2351e-17
ATRX	2.04439	3.28495	0.684203	8.70679e-06	1.59375e-05
AURKA	6.42352	20.392	1.66657	4.74266e-22	9.63213e-21
AURKB	6.52732	16.1624	1.30808	9.00224e-18	5.64626e-17
BABAM1	7.04721	10.0423	0.51096	5.53117e-09	1.33279e-08
BAHD1	9.10388	6.03542	-0.593026	1.14596e-12	4.02264e-12
BANF1	56.3389	81.8803	0.539384	1.50642e-10	4.29758e-10
BANF2	0.00345122	0.0268355	2.95897	0.00880779	0.0122963
BANP	1.4313	2.12395	0.569421	2.40001e-13	8.97897e-13
BARD1	1.17618	2.33362	0.988466	1.18266e-14	4.87347e-14
BAZ1B	12.1362	18.6005	0.616031	1.31745e-13	5.03938e-13
BCL10	16.0103	10.0893	-0.666171	5.9027e-13	2.14255e-12
BOD1	11.5834	22.2393	0.941045	1.30547e-18	9.437e-18
BRCA1	1.31986	3.58095	1.43995	1.63327e-19	1.40726e-18
BRCA2	0.357468	1.72296	2.26901	7.34488e-22	1.39131e-20
BRD9	2.91093	4.76146	0.709927	3.85487e-17	2.1352e-16
BRDT	0.00108537	0.0107706	3.31085	0.00403212	0.00584931
BRPF3	16.7867	9.37675	-0.840157	3.41785e-19	2.7766e-18
BRWD3	1.65965	2.57774	0.635227	0.000808722	0.00124971
BTAF1	3.63334	5.57686	0.618159	1.2458e-06	2.43174e-06
BUB1	2.50443	7.56725	1.59529	1.02104e-21	1.81448e-20
CARM1	13.9105	21.4885	0.627392	1.17254e-14	4.85524e-14
CBX2	0.250763	3.31334	3.72389	4.52134e-25	1.24688e-22
CBX3	22.3042	55.5782	1.31721	6.02019e-20	5.83548e-19
CBX4	5.13716	16.2228	1.65898	3.61684e-24	3.42796e-22
CBX5	5.20178	8.22774	0.661492	1.10292e-06	2.15778e-06
CBX6	8.4454	4.23645	-0.99531	1.40219e-11	4.41353e-11
CBX7	7.25309	2.37868	-1.60844	4.28889e-23	1.52434e-21
CBX8	1.2653	4.47499	1.8224	1.86153e-24	2.42737e-22
CDC6	2.52938	8.86922	1.81002	7.74632e-22	1.40587e-20
CDK1	5.72065	19.05	1.73554	9.98061e-20	9.15426e-19
CDK2	3.74286	9.13434	1.28716	1.44116e-23	7.23122e-22
CDK5	5.37404	10.4135	0.954371	9.20693e-20	8.53642e-19
CDK7	7.39408	13.8911	0.909722	6.89905e-19	5.20787e-18
CDYL2	0.743573	1.10241	0.568115	0.0218413	0.0291103
CHAF1A	4.45894	9.14421	1.03616	7.67709e-17	4.01752e-16
CHAF1B	1.31438	3.68915	1.4889	3.66791e-22	7.82181e-21
CHD1L	0.053039	0.167475	1.65882	2.62161e-12	8.83887e-12
CHD4	1.49575	2.64299	0.821303	5.47154e-19	4.20471e-18
CHD5	0.133405	0.0707397	-0.915218	1.04942e-07	2.27196e-07
CHD6	2.17098	3.92799	0.855445	5.39026e-08	1.19737e-07
CHD7	1.83892	4.34265	1.23972	1.07578e-16	5.46217e-16
CHEK1	2.4154	6.59252	1.44857	5.8431e-21	8.30694e-20
CHMP1B	30.1317	17.8129	-0.758358	3.79786e-18	2.43577e-17
CHTOP	10.1522	14.4683	0.511095	2.73239e-19	2.30765e-18
CIT	0.582307	1.35256	1.21584	3.51575e-18	2.28926e-17
CLNS1A	13.8204	23.8304	0.786002	4.62312e-20	4.69468e-19
CTCFL	0.00522195	0.0106277	1.02517	0.0327597	0.0424682
CUL4A	10.375	20.6087	0.990136	1.95914e-20	2.45757e-19
CUL4B	7.18687	10.235	0.510074	2.44504e-08	5.62161e-08
DBF4	2.29064	5.64915	1.30228	1.30547e-18	9.437e-18
DBF4B	0.703024	1.71012	1.28245	2.50592e-20	2.88858e-19
DDB2	4.08416	5.88222	0.526322	8.3152e-05	0.000138804
DDX21	16.3883	41.7063	1.3476	3.3506e-19	2.74814e-18
DEK	18.6453	31.5127	0.75712	1.41949e-12	4.92207e-12
DHX30	8.44344	13.5465	0.682018	3.78346e-17	2.10934e-16
DNAJC2	2.52435	6.28735	1.31654	1.53792e-19	1.33862e-18
DNMT1	3.88611	8.05551	1.05165	9.26343e-18	5.76767e-17
DNMT3B	0.482985	1.62558	1.7509	4.81503e-20	4.77584e-19
DNMT3L	0.000470732	0.0126368	4.74658	0.00356726	0.00520149
DNTT	0.00684146	0.0143383	1.06749	0.026565	0.0351316
DPF1	0.0514951	0.168078	1.70662	5.63139e-12	1.84753e-11
DPF3	1.21237	0.26563	-2.19034	1.19358e-23	6.78749e-22
DPY30	9.89192	15.2116	0.62085	2.19351e-13	8.24257e-13
DUSP1	109.042	57.9868	-0.911082	3.17535e-11	9.67349e-11
E2F6	1.6343	3.1647	0.953398	2.23113e-21	3.52437e-20
EHMT2	5.16918	9.80455	0.923515	1.68248e-18	1.17636e-17
EID1	65.4639	41.6843	-0.651197	2.31328e-10	6.42745e-10
ERBB4	0.0200488	0.00825497	-1.28018	7.27825e-17	3.85612e-16
ERCC6L	0.6665	2.53785	1.92893	4.94583e-21	7.1505e-20
EXOSC1	5.18312	7.42251	0.518086	5.09896e-14	2.02298e-13
EXOSC2	3.79867	8.92253	1.23196	7.5662e-24	4.96459e-22
EXOSC3	1.19955	2.70249	1.17179	4.42561e-24	3.43186e-22
EXOSC4	8.10782	24.9693	1.62277	4.00908e-20	4.27468e-19
EXOSC5	11.6723	32.0825	1.45869	1.9998e-20	2.47222e-19
EXOSC6	4.72624	7.37418	0.641792	2.55708e-15	1.11856e-14
EXOSC7	3.50468	8.32815	1.24871	2.82472e-24	3.01186e-22
EXOSC8	4.74537	11.6413	1.29465	8.49306e-21	1.13197e-19
EXOSC9	3.01181	5.02043	0.737181	2.01081e-14	8.20678e-14
EYA1	0.0279829	0.271285	3.27719	0.025192	0.0334196
EYA2	7.01171	1.10403	-2.66699	2.0836e-20	2.50326e-19
EYA3	3.96389	5.6152	0.502421	4.0836e-09	1.00095e-08
EZH2	3.48542	9.40222	1.43167	5.95486e-23	1.95365e-21
FBL	55.2848	124.966	1.17658	8.06393e-21	1.09183e-19
FBRSL1	6.36829	10.5897	0.733678	1.70228e-12	5.85501e-12
FBXL19	4.58108	7.1116	0.634488	4.85066e-10	1.31771e-09
FMR1	5.13817	7.77797	0.59814	4.57271e-06	8.51642e-06
FOXA1	10.2967	7.12506	-0.531208	9.73806e-06	1.77491e-05
FOXO1	6.14697	4.31304	-0.51117	6.69563e-12	2.17163e-11
FOXP2	1.27233	0.353816	-1.84641	5.83191e-16	2.71837e-15
FOXP3	0.461527	1.34899	1.54739	1.48396e-11	4.65376e-11
FOXP4	12.2198	25.5552	1.0644	1.33569e-16	6.70202e-16
GABRG1	0.0175683	0.0030222	-2.5393	9.42552e-38	8.03997e-35
GADD45G	4.82471	7.86695	0.705362	0.0157444	0.0213513
GATAD1	6.19562	9.07941	0.55135	2.07148e-10	5.79336e-10
GFI1	1.90983	1.16914	-0.707993	1.16744e-09	3.05468e-09
GFI1B	0.286317	0.0734581	-1.96262	6.10484e-21	8.53677e-20
GLYATL1	0.054878	0.499791	3.18702	1.45328e-12	5.01882e-12
GSE1	7.14067	10.2412	0.520258	3.68439e-06	6.92244e-06
GTF2I	1.20625	2.06921	0.778546	9.28032e-13	3.28469e-12
GTF3C4	3.66383	5.68918	0.634869	3.9285e-14	1.57324e-13
HCFC2	2.55035	1.37664	-0.889542	4.23258e-17	2.31435e-16
HDAC10	0.10662	0.478386	2.1657	8.65874e-17	4.47631e-16
HDAC2	5.29403	9.94813	0.910058	1.66616e-18	1.17458e-17
HDAC7	4.01971	6.29579	0.647296	3.68355e-11	1.10636e-10
HDAC8	0.21388	0.576746	1.43113	5.86298e-19	4.46529e-18
HDAC9	0.871268	0.324497	-1.42491	7.04354e-20	6.67571e-19
HDGF	82.1757	129.313	0.654083	6.55555e-16	3.03907e-15
HELLS	0.959112	3.26624	1.76786	4.09158e-20	4.29931e-19
HIRA	2.96645	4.66283	0.652468	1.09178e-11	3.47497e-11
HJURP	2.1933	7.82775	1.8355	1.99198e-24	2.42737e-22
HLCS	1.78599	3.20636	0.844215	4.64786e-19	3.63727e-18
HMGA1	86.9047	244.147	1.49024	1.07767e-20	1.41423e-19
HMGA2	0.43061	1.43992	1.74154	3.68989e-10	1.01205e-09
HMGB1	26.0061	43.9839	0.758128	3.76635e-11	1.12726e-10
HMGB2	44.0422	68.7928	0.643373	1.91151e-07	4.05602e-07
HMGB3	11.9511	21.3802	0.839136	1.81304e-12	6.21095e-12
HNF1A	2.60009	4.0632	0.644057	2.69542e-08	6.13117e-08
HNRNPA1	69.9592	122.754	0.81118	3.45197e-19	2.77786e-18
HSPA1A	24.3238	15.987	-0.605468	5.42321e-09	1.31048e-08
HUWE1	12.4011	19.2399	0.633633	9.38075e-09	2.21656e-08
IDH2	72.9018	107.518	0.560547	1.81112e-05	3.23874e-05
IGFBP7	63.4178	116.438	0.876606	2.59866e-06	4.93688e-06
IKZF1	2.241	0.945203	-1.24545	2.03301e-15	8.93896e-15
IKZF3	2.06121	1.14573	-0.847226	5.28243e-09	1.28374e-08
ING1	3.13305	4.92199	0.651675	2.05499e-16	1.01324e-15
ING5	2.6367	4.08748	0.63248	1.39689e-11	4.41314e-11
INO80B	0.0886976	0.289977	1.70897	1.00486e-12	3.54192e-12
INO80D	1.4148	2.12595	0.587507	0.0122755	0.016916
JADE3	1.80451	5.26214	1.54404	1.22121e-22	3.36028e-21
JMJD4	0.979505	1.97215	1.00964	1.98772e-17	1.17745e-16
JMJD7	0.0275439	0.095856	1.79914	8.48405e-08	1.85818e-07
KANSL2	5.91699	9.0359	0.610805	5.88008e-14	2.32209e-13
KAT2A	8.10394	25.7134	1.66583	3.67854e-23	1.36426e-21
KAT2B	6.96687	2.55018	-1.44991	3.38779e-23	1.31354e-21
KDM1A	13.0439	25.178	0.948791	4.30732e-22	8.96133e-21
KDM2B	1.56764	2.45158	0.645113	8.73934e-17	4.49076e-16
KDM3A	3.82161	5.55105	0.538582	1.48112e-08	3.45191e-08
KMT2B	5.43939	7.91922	0.541912	2.91529e-08	6.57869e-08
KMT5C	1.8001	3.6483	1.01915	9.81122e-16	4.49945e-15
L3MBTL1	0.109173	0.330639	1.59864	4.39508e-07	9.0775e-07
LAS1L	2.54253	5.64425	1.15052	2.05222e-22	4.86262e-21
LBR	20.3604	32.0778	0.655813	2.80767e-08	6.36952e-08
LMNB1	18.5376	30.8324	0.733994	3.52327e-11	1.06573e-10
LMNB2	17.4109	38.8437	1.15769	2.25242e-18	1.52485e-17
LRWD1	2.52617	4.63585	0.875882	1.13839e-18	8.44391e-18
MAPKAPK3	12.9602	20.4118	0.655312	4.93313e-15	2.10399e-14
MASTL	1.74167	3.88892	1.1589	3.26925e-20	3.62165e-19
MDC1	3.41137	5.76655	0.757359	1.58232e-11	4.94404e-11
MDM2	2.5631	4.29663	0.745319	0.0001055	0.000173728
MDM4	2.31263	3.95506	0.774166	9.73166e-07	1.91711e-06
MEN1	7.09816	10.8777	0.615857	1.13994e-13	4.38005e-13
MIER1	12.0174	5.93702	-1.01731	1.49939e-20	1.90893e-19
MIER2	1.56812	2.59495	0.726667	2.19067e-16	1.0678e-15
MIER3	21.6161	6.37091	-1.76253	1.7644e-22	4.42657e-21
MIS18BP1	3.35196	4.83139	0.527432	1.7801e-05	3.18998e-05
MLLT6	9.88564	14.0735	0.509573	2.4186e-07	5.1066e-07
MOCS1	5.93774	1.82417	-1.70268	3.06879e-23	1.24651e-21
MORF4L2	53.0373	95.0771	0.842091	1.88717e-17	1.1257e-16
MRGBP	5.0946	17.0093	1.73928	5.84703e-25	1.24688e-22
MSH6	2.9221	5.29245	0.856933	5.86521e-17	3.16647e-16
MSL1	9.3461	13.3004	0.509039	4.05493e-12	1.34064e-11
MSL3	2.4416	3.65368	0.581524	3.20551e-13	1.18368e-12
MST1	0.3352	1.16174	1.7932	3.19661e-16	1.5233e-15
MTA1	4.52064	8.12635	0.846078	1.16237e-15	5.30217e-15
MYBBP1A	7.06359	15.4864	1.13253	1.76644e-18	1.21514e-17
MYO1C	54.4971	32.0167	-0.767356	4.76635e-20	4.77584e-19
NAP1L1	9.48454	22.1994	1.22687	4.00908e-20	4.27468e-19
NAP1L2	1.68466	0.163219	-3.36758	3.30473e-25	1.24688e-22
NAP1L3	1.49986	0.439462	-1.77102	3.09278e-17	1.78253e-16
NAP1L5	2.21554	1.44419	-0.617396	7.5015e-05	0.000125713
NASP	8.7012	14.3124	0.717977	2.51032e-13	9.31001e-13
NAT10	9.0377	20.2426	1.16336	2.21311e-22	5.10212e-21
NBN	8.16669	12.3926	0.601651	1.08829e-07	2.34423e-07
NCL	50.8131	98.1092	0.949187	3.54352e-17	1.98857e-16
NCOA1	8.10507	4.98721	-0.700591	5.00667e-17	2.72018e-16
NCOA4	83.2817	46.4667	-0.8418	9.61762e-23	2.82891e-21
NCOA7	8.71608	17.9953	1.04587	6.01417e-11	1.78749e-10
NEK6	10.7778	19.4291	0.850155	3.22658e-17	1.84716e-16
NFYB	4.77945	6.86806	0.523058	1.24153e-09	3.21891e-09
NOC2L	12.0312	23.106	0.941483	1.45354e-18	1.04191e-17
NPAS2	2.1106	3.79302	0.845692	6.34511e-12	2.06579e-11
NPM1	38.3832	87.6355	1.19104	2.55511e-18	1.70274e-17
NPM2	0.362054	1.3027	1.84723	8.49e-12	2.74317e-11
OGT	9.69994	21.5035	1.14853	8.00925e-14	3.13389e-13
ORC1	2.68718	5.88799	1.13169	2.59538e-14	1.05422e-13
ORC2	4.12368	6.65771	0.691092	8.28054e-14	3.22525e-13
PADI1	0.115595	0.672857	2.54122	2.16516e-09	5.51307e-09
PADI2	96.3283	10.7283	-3.16654	1.16744e-23	6.78749e-22
PADI3	0.0399756	1.59685	5.31996	1.48215e-07	3.16068e-07
PARP1	7.02194	10.0434	0.516308	1.18353e-09	3.0873e-09
PARP2	2.68525	4.32588	0.687935	6.79347e-13	2.44508e-12
PATZ1	5.14297	9.30641	0.855624	1.62944e-15	7.35405e-15
PAXIP1	1.28904	2.30843	0.840613	1.01837e-19	9.24115e-19
PBK	5.32468	12.8944	1.27598	1.38188e-10	3.96882e-10
PCGF1	5.96469	9.25808	0.634265	3.54988e-18	2.29397e-17
PCGF3	4.17509	6.04791	0.53463	2.28679e-11	7.06751e-11
PCNA	63.8534	151.138	1.24303	1.16407e-17	7.09254e-17
PDP1	3.22709	7.77374	1.26838	1.03852e-17	6.37306e-17
PDS5B	2.66473	3.87047	0.538518	1.01155e-05	1.83978e-05
PES1	13.9059	27.1341	0.964405	4.00907e-20	4.27468e-19
PHC2	17.9125	26.9806	0.590956	6.4042e-15	2.70435e-14
PHF14	2.09171	4.31817	1.04574	1.18385e-18	8.70534e-18
PHF19	3.99013	8.79707	1.14059	3.07492e-20	3.45119e-19
PHF20	4.11992	7.63546	0.890098	1.90258e-15	8.45262e-15
PHF20L1	1.274	2.35376	0.885602	8.7412e-13	3.10677e-12
PHF6	2.96694	5.98385	1.0121	6.86864e-17	3.66184e-16
PHF7	2.26405	1.33697	-0.759936	3.86279e-14	1.55423e-13
PHF8	4.07062	5.8768	0.52978	2.43735e-08	5.61908e-08
PHIP	2.41534	3.42956	0.505798	0.00135788	0.00206834
PIWIL4	1.48881	2.81895	0.920999	4.11074e-09	1.00472e-08
PKM	80.0813	167.073	1.06094	3.01221e-18	1.97647e-17
PKN1	14.074	22.7765	0.694514	2.68697e-08	6.12829e-08
POLE3	21.6618	36.0795	0.736025	1.0025e-13	3.86938e-13
PPARGC1A	4.01762	1.33329	-1.59135	2.40532e-20	2.84964e-19
PPM1G	28.9001	50.903	0.816678	5.44942e-22	1.08101e-20
PPP4C	37.3495	55.8957	0.581648	2.90863e-09	7.29724e-09
PRC1	0.0376024	0.207824	2.46646	1.75077e-16	8.6826e-16
PRDM12	0.017661	0.14958	3.08228	1.78421e-21	2.92679e-20
PRDM13	0.00884634	0.166569	4.23489	5.35724e-05	9.10305e-05
PRDM6	0.619776	0.190086	-1.7051	1.085e-10	3.14797e-10
PRDM9	0	0.00522854	Inf	0.0177134	0.0239075
PRKAA2	0.954105	0.3226	-1.5644	1.79158e-15	8.04324e-15
PRKCB	2.64571	0.621216	-2.09049	2.77443e-22	6.22788e-21
PRKCD	34.6889	20.8459	-0.734711	1.9624e-15	8.67319e-15
PRKDC	8.10173	20.7128	1.35422	9.35216e-18	5.78072e-17
PRMT1	18.8176	47.1978	1.32663	2.06235e-20	2.50326e-19
PRMT3	2.08935	5.51909	1.40138	1.44806e-21	2.47038e-20
PRMT5	5.6725	11.8708	1.06536	5.57535e-16	2.61306e-15
PRMT7	2.89194	4.46819	0.627652	1.6079e-15	7.29543e-15
PRMT8	0.00731463	0.0120429	0.719327	0.000121351	0.000199062
PRPF31	9.78608	15.5497	0.668081	2.25757e-17	1.31898e-16
PYGO1	0.439649	0.295953	-0.570982	4.73503e-07	9.75599e-07
RAC3	1.58126	4.20296	1.41033	1.73877e-10	4.91117e-10
RAD51	3.6035	6.22602	0.78891	4.07142e-10	1.10956e-09
RAD54B	0.132798	0.618352	2.2192	5.9547e-23	1.95365e-21
RAD54L	0.864561	2.8139	1.70253	2.18468e-21	3.51611e-20
RAD54L2	1.65889	2.75392	0.731268	1.13288e-14	4.7139e-14
RAI1	2.71681	4.39849	0.695094	1.93063e-09	4.94544e-09
RB1	7.72306	11.6072	0.587778	3.71943e-07	7.71941e-07
RBBP7	15.1817	25.6361	0.75585	1.5903e-16	7.93292e-16
RCC1	11.246	25.1546	1.16141	3.96656e-19	3.13285e-18
RCOR2	0.731251	2.30576	1.6568	2.07242e-12	7.04294e-12
RLIM	3.09232	6.77906	1.1324	2.49314e-20	2.88858e-19
RNF8	2.30253	3.96446	0.783903	1.40949e-20	1.82166e-19
RPS6KA5	0.92441	0.517621	-0.836637	4.34619e-18	2.76664e-17
RUVBL1	4.16356	11.5174	1.46793	5.82103e-24	4.13779e-22
RUVBL2	21.4337	45.7016	1.09236	2.63759e-20	2.99982e-19
SAP18	36.9217	55.4201	0.58594	1.86774e-10	5.24073e-10
SAP25	0.000543902	0.00835877	3.94187	0.0136031	0.0186551
SAP30	4.96969	8.43531	0.763286	4.98656e-11	1.48725e-10
SAP30L	8.75302	5.99409	-0.54624	5.50051e-15	2.3343e-14
SATB2	16.9597	10.1173	-0.745294	8.66502e-11	2.53995e-10
SCML1	2.00684	6.92219	1.78631	2.60511e-18	1.7226e-17
SCML2	0.494061	1.06715	1.11101	3.62381e-05	6.2573e-05
SENP1	2.40147	3.72501	0.633327	2.48989e-13	9.27457e-13
SENP3	2.24951	3.53791	0.653284	8.38451e-14	3.25091e-13
SET	48.821	94.598	0.954306	5.3844e-20	5.27918e-19
SETBP1	1.41965	0.411011	-1.78828	1.34298e-19	1.181e-18
SETD4	1.5415	2.26169	0.553065	8.88807e-12	2.83953e-11
SETD5	5.40683	8.42826	0.640453	1.30108e-12	4.52987e-12
SETD6	1.05082	2.37304	1.17522	1.0721e-22	3.04835e-21
SETD9	4.6729	3.03998	-0.620258	2.67014e-08	6.10624e-08
SETDB1	2.85238	4.12654	0.532766	3.32495e-13	1.22249e-12
SF3B3	10.4359	21.3792	1.03465	1.96419e-23	9.3081e-22
SFMBT2	0.95501	0.578912	-0.72217	3.66572e-12	1.22622e-11
SFPQ	28.9909	45.2058	0.640909	3.47777e-17	1.9646e-16
SIRT4	0.845683	0.51048	-0.728261	2.45272e-08	5.62411e-08
SIRT6	22.4256	13.991	-0.68065	4.24057e-13	1.55245e-12
SLF1	0.891863	1.30801	0.552475	9.23208e-06	1.68629e-05
SMARCA4	8.31595	14.0799	0.759682	3.14395e-15	1.36826e-14
SMARCAD1	4.10597	6.26663	0.609968	3.58747e-10	9.87134e-10
SMARCC1	15.0565	27.7968	0.88453	6.86778e-20	6.58227e-19
SMARCD1	10.6194	16.4763	0.633687	2.50389e-17	1.45294e-16
SMARCD2	31.6896	50.6819	0.677462	1.39415e-17	8.43411e-17
SMARCD3	1.91663	1.28594	-0.575751	1.85174e-05	3.30446e-05
SMARCE1	0.377788	0.590782	0.645049	0.00249258	0.00370412
SMC1A	11.2156	16.8365	0.586081	7.23171e-08	1.58986e-07
SMCHD1	6.93179	4.07561	-0.76621	3.87988e-15	1.67997e-14
SMYD1	1.66836	0.0911402	-4.1942	5.91939e-08	1.31149e-07
SMYD2	5.0056	10.0505	1.00565	7.42353e-22	1.39131e-20
SMYD3	1.72706	3.89593	1.17365	2.95294e-23	1.24651e-21
SMYD5	6.18176	13.8717	1.16606	7.82146e-23	2.471e-21
SND1	29.6763	61.9422	1.06161	1.68977e-22	4.36781e-21
SP140	1.07671	0.606791	-0.827362	1.12047e-09	2.94987e-09
SRCAP	0.267941	0.385273	0.523964	3.48804e-05	6.03509e-05
SRSF1	8.72401	13.9949	0.681841	1.98811e-13	7.50379e-13
SS18L1	2.69555	5.59498	1.05355	7.23622e-16	3.33648e-15
SS18L2	3.92133	5.80681	0.566405	6.30762e-11	1.86819e-10
SSRP1	20.8834	34.8061	0.736984	7.0363e-19	5.26488e-18
STK31	0.0444976	0.690611	3.95607	2.79651e-21	4.18496e-20
STK4	5.48846	8.74074	0.671354	3.02692e-08	6.81258e-08
SUPT16H	15.0041	22.7302	0.599249	1.089e-10	3.14887e-10
SUPT3H	0.712785	1.30278	0.870053	5.0776e-14	2.02298e-13
SUV39H1	2.52888	6.37332	1.33355	1.36625e-21	2.37839e-20
SUV39H2	1.70307	4.34177	1.35014	2.53109e-21	3.85539e-20
SUZ12	5.7043	8.64062	0.599084	3.95866e-10	1.08229e-09
SYNCRIP	11.3893	20.9857	0.881723	9.41018e-17	4.80652e-16
TADA2B	8.38243	5.606	-0.580397	7.50294e-22	1.39131e-20
TAF1	3.48585	5.26536	0.595022	3.61675e-06	6.81035e-06
TAF10	0.385705	0.782608	1.02079	2.57188e-07	5.40348e-07
TAF1L	0.00291951	0.0102008	1.80489	0.000133047	0.000216997
TAF2	3.7526	6.14224	0.710873	8.62072e-12	2.7749e-11
TAF4	2.5577	4.71871	0.883547	6.24432e-13	2.25695e-12
TAF6L	2.35009	3.50568	0.576977	1.56502e-09	4.03313e-09
TAF9	12.1027	19.8748	0.715618	6.66617e-14	2.62039e-13
TDRD5	0.271615	0.669672	1.30189	0.0011404	0.00174957
TDRD7	12.6884	8.38523	-0.597586	4.93315e-15	2.10399e-14
TDRKH	1.47859	2.52783	0.773675	2.10586e-11	6.53199e-11
TEX10	2.39097	5.47425	1.19506	2.79489e-23	1.24651e-21
TFDP1	24.0875	48.9691	1.02359	4.62313e-20	4.69468e-19
TLE4	3.1941	1.79907	-0.828158	2.46652e-16	1.19542e-15
TONSL	2.28157	6.27957	1.46064	2.56102e-19	2.18455e-18
TOP2A	10.3306	31.1752	1.59348	3.70044e-19	2.94998e-18
TOPBP1	4.48863	8.0656	0.845506	8.26744e-17	4.30008e-16
TOX	6.37938	2.5715	-1.31081	1.10087e-16	5.55645e-16
TOX2	1.7913	1.11319	-0.686312	5.1452e-09	1.25396e-08
TP53	12.7581	22.1571	0.796348	2.87e-09	7.22158e-09
TRIM16	1.84519	3.90053	1.0799	2.70174e-16	1.29471e-15
TRIM24	3.30954	5.74363	0.795334	4.275e-13	1.55837e-12
TRIM27	6.31032	12.5198	0.988426	8.81161e-25	1.50326e-22
TRIM28	54.6061	111.115	1.02492	2.37645e-21	3.68566e-20
TRRAP	3.77132	5.53407	0.553271	2.4471e-07	5.15401e-07
TSPYL5	2.33518	0.915761	-1.35049	1.2908e-12	4.51253e-12
TSSK6	0.949051	1.41329	0.574498	9.68267e-05	0.000160064
TTF2	2.04859	4.01316	0.97011	4.07734e-17	2.24385e-16
TTK	2.03144	5.52136	1.44252	1.74932e-18	1.21314e-17
TYW5	0.723585	1.17877	0.704048	3.56264e-11	1.07383e-10
UBE2T	5.90104	18.5409	1.65167	1.49469e-21	2.49994e-20
UBR5	5.41609	7.69913	0.507443	0.000286606	0.000456963
UCHL5	4.75271	6.91692	0.541379	2.28494e-09	5.78355e-09
UHRF1	1.42637	5.8063	2.02527	9.10879e-23	2.77493e-21
UHRF2	2.6926	4.35032	0.692121	8.8881e-12	2.83953e-11
USP36	4.2777	8.08924	0.919168	1.83445e-17	1.10196e-16
USP44	0.105066	0.0627822	-0.742865	9.32109e-09	2.20858e-08
USP49	0.397944	0.639979	0.685459	1.33438e-07	2.85269e-07
VDR	38.2063	19.0743	-1.00218	6.20168e-17	3.32707e-16
VPS72	18.7238	27.8375	0.572158	8.34072e-18	5.2701e-17
VRK1	5.22062	9.48601	0.861579	5.21384e-12	1.71715e-11
WDR5	12.1452	21.5036	0.824196	7.67633e-20	7.19551e-19
WDR77	6.11966	18.6551	1.60805	1.27577e-23	6.80147e-22
XRCC1	7.28431	11.7171	0.685746	2.58148e-16	1.24407e-15
YAF2	1.01134	1.65007	0.706264	1.18769e-10	3.42264e-10
YEATS2	2.44265	4.73165	0.953895	1.24551e-19	1.10669e-18
YEATS4	7.76646	15.0379	0.953275	1.25599e-14	5.15078e-14
ZBTB16	2.1435	0.239456	-3.16213	4.13298e-20	4.29931e-19
ZBTB24	2.08752	3.13325	0.585872	2.60136e-12	8.80539e-12
ZBTB33	4.29276	8.27428	0.94673	2.19069e-16	1.0678e-15
ZBTB4	13.9435	9.38756	-0.570768	2.62505e-07	5.50165e-07
ZBTB7C	12.3346	3.01478	-2.03258	7.0459e-21	9.69379e-20
ZCWPW2	0.12178	0.0831899	-0.549804	6.40155e-07	1.29396e-06
ZGPAT	1.31388	2.21945	0.756371	4.98521e-07	1.02221e-06
ZMYM1	1.47913	2.44942	0.727691	7.9443e-10	2.11767e-09
ZMYM2	3.97096	7.18477	0.855453	7.13678e-10	1.9204e-09
ZMYM3	4.37656	6.64817	0.603162	1.91575e-12	6.53653e-12
ZMYM5	2.49317	4.11855	0.724158	2.87e-09	7.22158e-09
ZMYND8	8.17335	13.868	0.762761	7.09353e-09	1.69016e-08
ZRANB3	0.346827	0.737841	1.08909	3.46865e-16	1.64375e-15
ZZZ3	3.13252	4.78976	0.612628	2.35629e-11	7.256e-11
