# Supplementary material
Source: publisher figshare collection journal article supplement (https://future-science-group.figshare.com/articles/dataset/_/21769256)

Supplemental Figure 1 Heatmap showed all differentially expressed CRs.

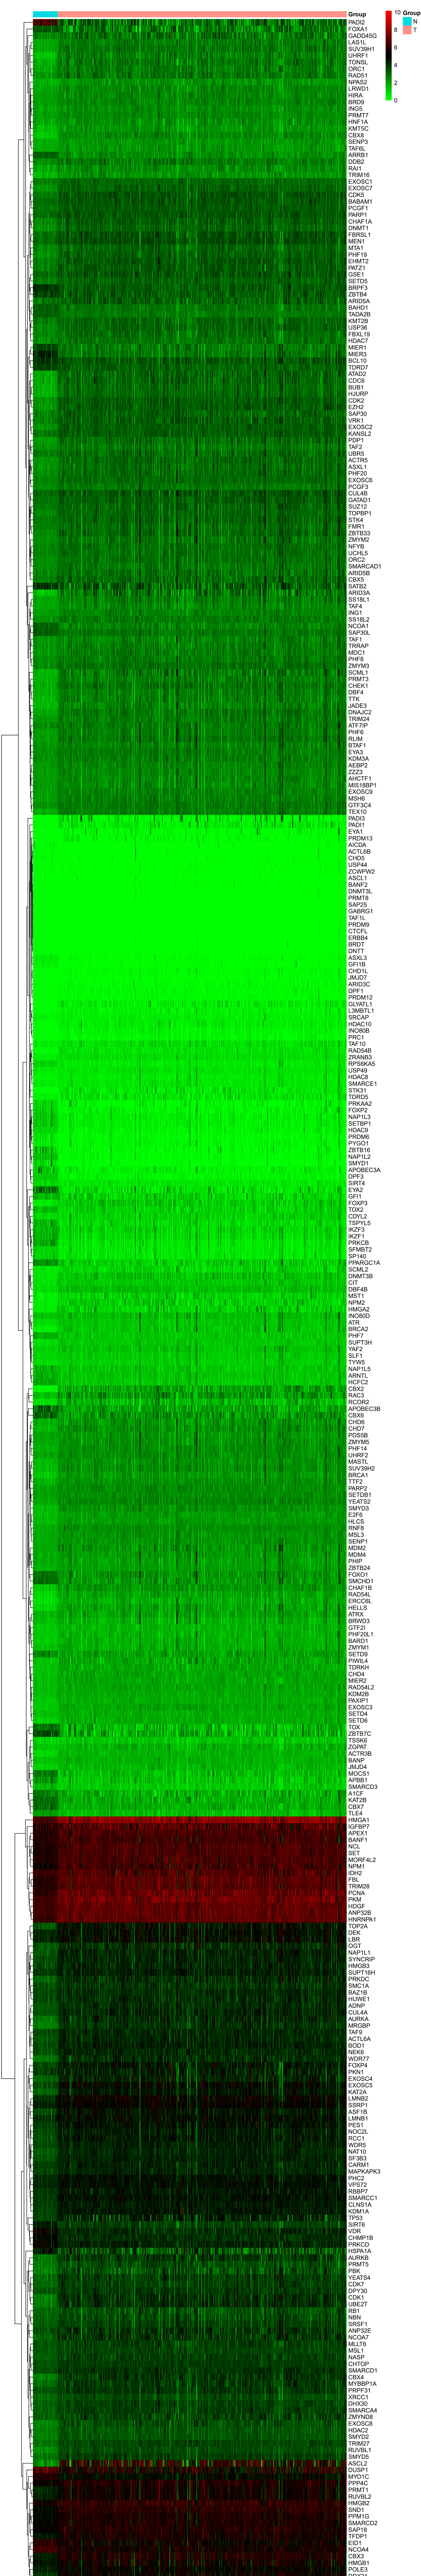

Supplement: Supplementary file 1 [file 1]
